# Supplementary material for: Substrate-Dependent Activation of the Vibrio cholerae vexAB RND Efflux System Requires vexR
Source: PubMed Central journal article supplement (PMC4335029; doi:10.1371/journal.pone.0117890), 2015-02-19
Supplement: pone.0117890.s001.pdf [file pone.0117890.s001.pdf]

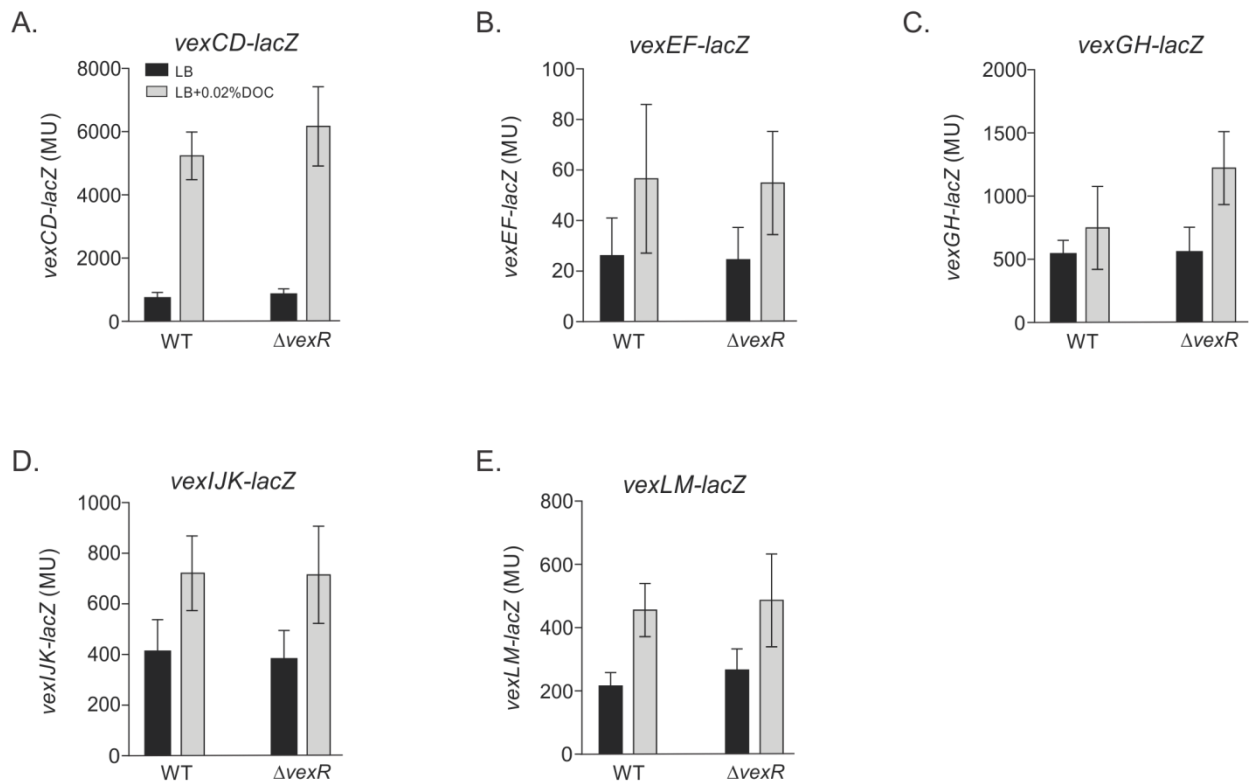

**Figure S1. Effect of VexR on the expression of *Vibrio cholerae* RND efflux systems.** Overnight cultures of *Vibrio cholerae* strain JB58 (N16961  $\Delta$ *lacZ*  $S$ m<sup>R</sup>) or the isogenic  $\Delta$ *vexR* mutant bearing the transcriptional fusion reporters for the indicated RND efflux system were diluted 1:100 into LB broth and grown with shaking for 3.5 h at 37°C when deoxycholate (DOC) was added to 0.02%. The culture was incubated with shaking at 37°C for an additional 30 min when aliquots were collected in triplicate and  $\beta$ -galactosidase activity was quantified as described in the methods. (A.) *vexCD*; (B.) *vexEF*; (C.) *vexGH*; (D.) *vexIJK*; (E.) *vexLM*. The reported results are in Miller Units (MU) and are the mean  $\pm$  SD of three independent experiments.
