# Supplementary material for: Substrate-Dependent Activation of the Vibrio cholerae vexAB RND Efflux System Requires vexR
Source: PubMed Central journal article supplement (PMC4335029; doi:10.1371/journal.pone.0117890), 2015-02-19
Supplement: pone.0117890.s002.pdf [file pone.0117890.s002.pdf]

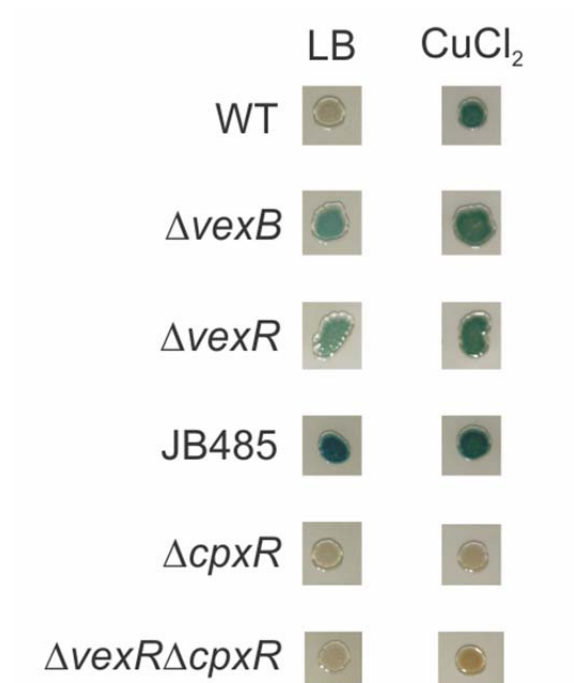

**Figure S2. Deletion of *vexR* results in upregulation of the *Vibrio cholerae* Cpx system.** The indicated strains containing a chromosomal *cpxP-lacZ* transcriptional reporter were cultured overnight in LB broth before being diluted 1:100 into fresh LB broth. The cultures were incubated an additional hour and diluted 1,000-fold into PBS. Aliquots of the diluted cultures were then inoculated onto the surface of LB agar plates containing X-gal (160 μg/mL) plus and minus 500 μM CuCl<sub>2</sub> (to induce expression of the Cpx system). The plates were then incubated overnight at 37°C before being photographed.
