# Supplementary material for: Substrate-Dependent Activation of the Vibrio cholerae vexAB RND Efflux System Requires vexR
Source: PubMed Central journal article supplement (PMC4335029; doi:10.1371/journal.pone.0117890), 2015-02-19
Supplement: pone.0117890.s003.pdf [file pone.0117890.s003.pdf]

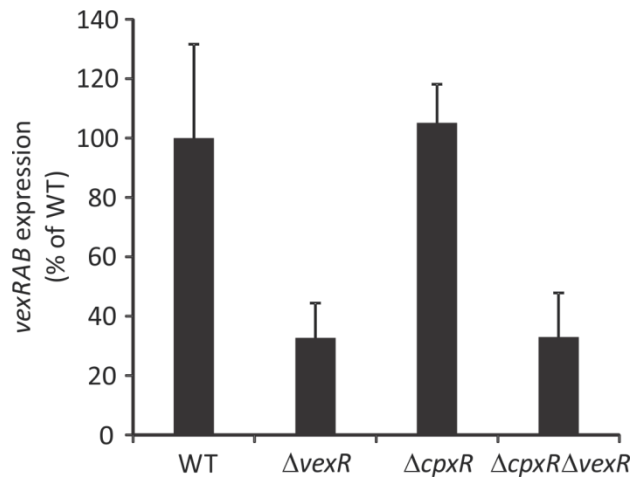

**Figure S3. CpxR does not affect *vexRAB* expression in a *vexR* mutant.** The indicated *V. cholerae* N16961 strains containing a *vexRAB-lacZ* transcriptional reporter were cultured to middle logarithmic phase in LB broth when *vexRAB-lacZ* expression was quantified by a  $\beta$ -galactosidase assay as described in the methods. The results are the average  $\pm$ SD of five independent experiments.
