# Supplementary material for: Substrate-Dependent Activation of the Vibrio cholerae vexAB RND Efflux System Requires vexR
Source: PubMed Central journal article supplement (PMC4335029; doi:10.1371/journal.pone.0117890), 2015-02-19
Supplement: pone.0117890.s004.pdf [file pone.0117890.s004.pdf]

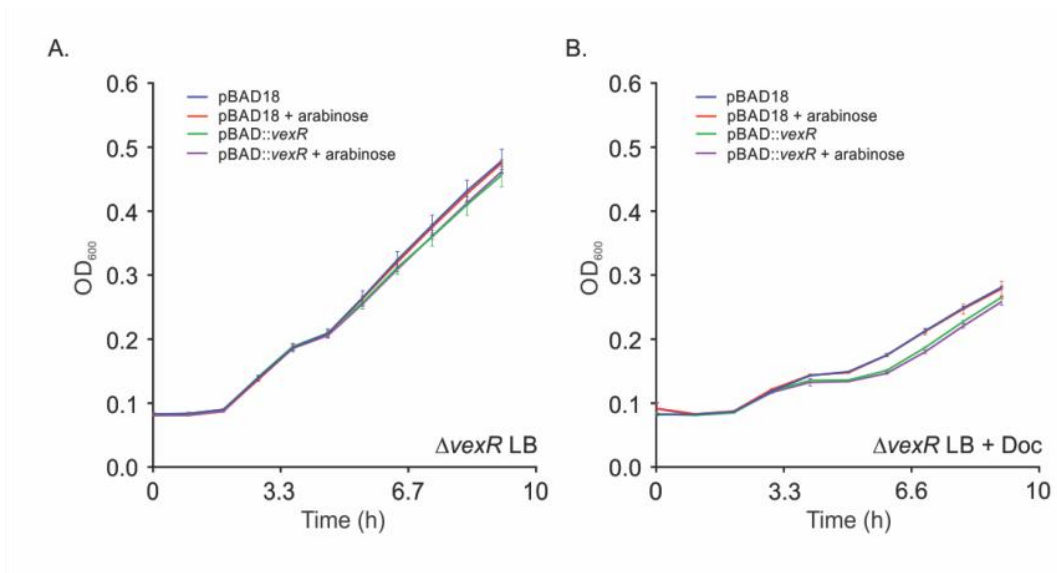

**Figure S4. Episomal *vexR* expression does not provide a growth advantage to a *vexR* deletion**

**mutant.** *V. cholerae* N16961  $\Delta vexR$  containing pJB703 (pBAD18::*vexR*) or pBAD18 were grown in triplicate wells of microtiter plates containing (A) LB broth or (B) LB broth plus 0.015% deoxycholate. Arabinose (0.1%) was added to the media as indicated to induce expression of *vexR* from the arabinose regulated promoter in pBAD18. Cell growth was then monitored as the change in the optical density at 600 nm and plotted versus time as the mean  $\pm$ SEM.
