# Supplementary material for: Substrate-Dependent Activation of the Vibrio cholerae vexAB RND Efflux System Requires vexR
Source: PubMed Central journal article supplement (PMC4335029; doi:10.1371/journal.pone.0117890), 2015-02-19
Supplement: pone.0117890.s006.pdf [file pone.0117890.s006.pdf]

**Table S2. Minimum inhibitory concentration of erythromycin for *Vibrio cholerae* mutants.**

| <b>Strain:</b>            | <b>MIC (ug/mL)<sup>1</sup>:</b> | <b>S.D.</b> |
|---------------------------|---------------------------------|-------------|
| WT                        | 2.12                            | 0.024       |
| $\Delta vexR$             | 0.15                            | 0.058       |
| $\Delta vexR \Delta cpxR$ | 0.11                            | 0.031       |
| $\Delta cpxR$             | 2.11                            | 0.059       |
| $\Delta vexB$             | 0.05                            | 0.001       |
| $\Delta vexBDFHKM$        | 0.05                            | 0.001       |

<sup>1</sup>MICs were determined using gradient agar plates as previously described (*Infection and Immunity*; 76(8):3595-3605).
